# Supplementary material for: Optical fibre taper-enabled waveguide photoactuators
Source: Research Square preprint supplement (doi:10.21203/rs.3.rs-657262/v1), 2021-07-12
Supplement: Supplementary file 1 [file 687c00237d02a2707913f3fd.docx]

Supplementary Information for

**Optical fibre taper-enabled waveguide photoactuators**

Jianliang Xiao1, Tao Zhou2, Ni Yao1, Shuqi Ma1, Chenxinyu Pan3, Pan Wang*3, Haoran Fu2, Haitao Liu1, Jing Pan3, Longteng Yu1, Shipeng Wang1, Wenzhen Yang*1, Limin Tong3, Lei Zhang*1,3

1 Research Center for Intelligent Sensing, Zhejiang Lab, Hangzhou, China.

2 Institute of Flexible Electronics Technology of THU, Zhejiang, Jiaxing, China.

3 State Key Lab of Modern Optical Instrumentation, College of Optical Science and Engineering, Zhejiang University, Hangzhou, China.

**Corresponding author:**

*E-mail: nanopan@zju.edu.cn; ywz@zhejianglab.edu.cn; zhang_lei@zju.edu.cn





**Supplementary Fig. 1** Extinction spectrum of AuNRs dispersed in water.


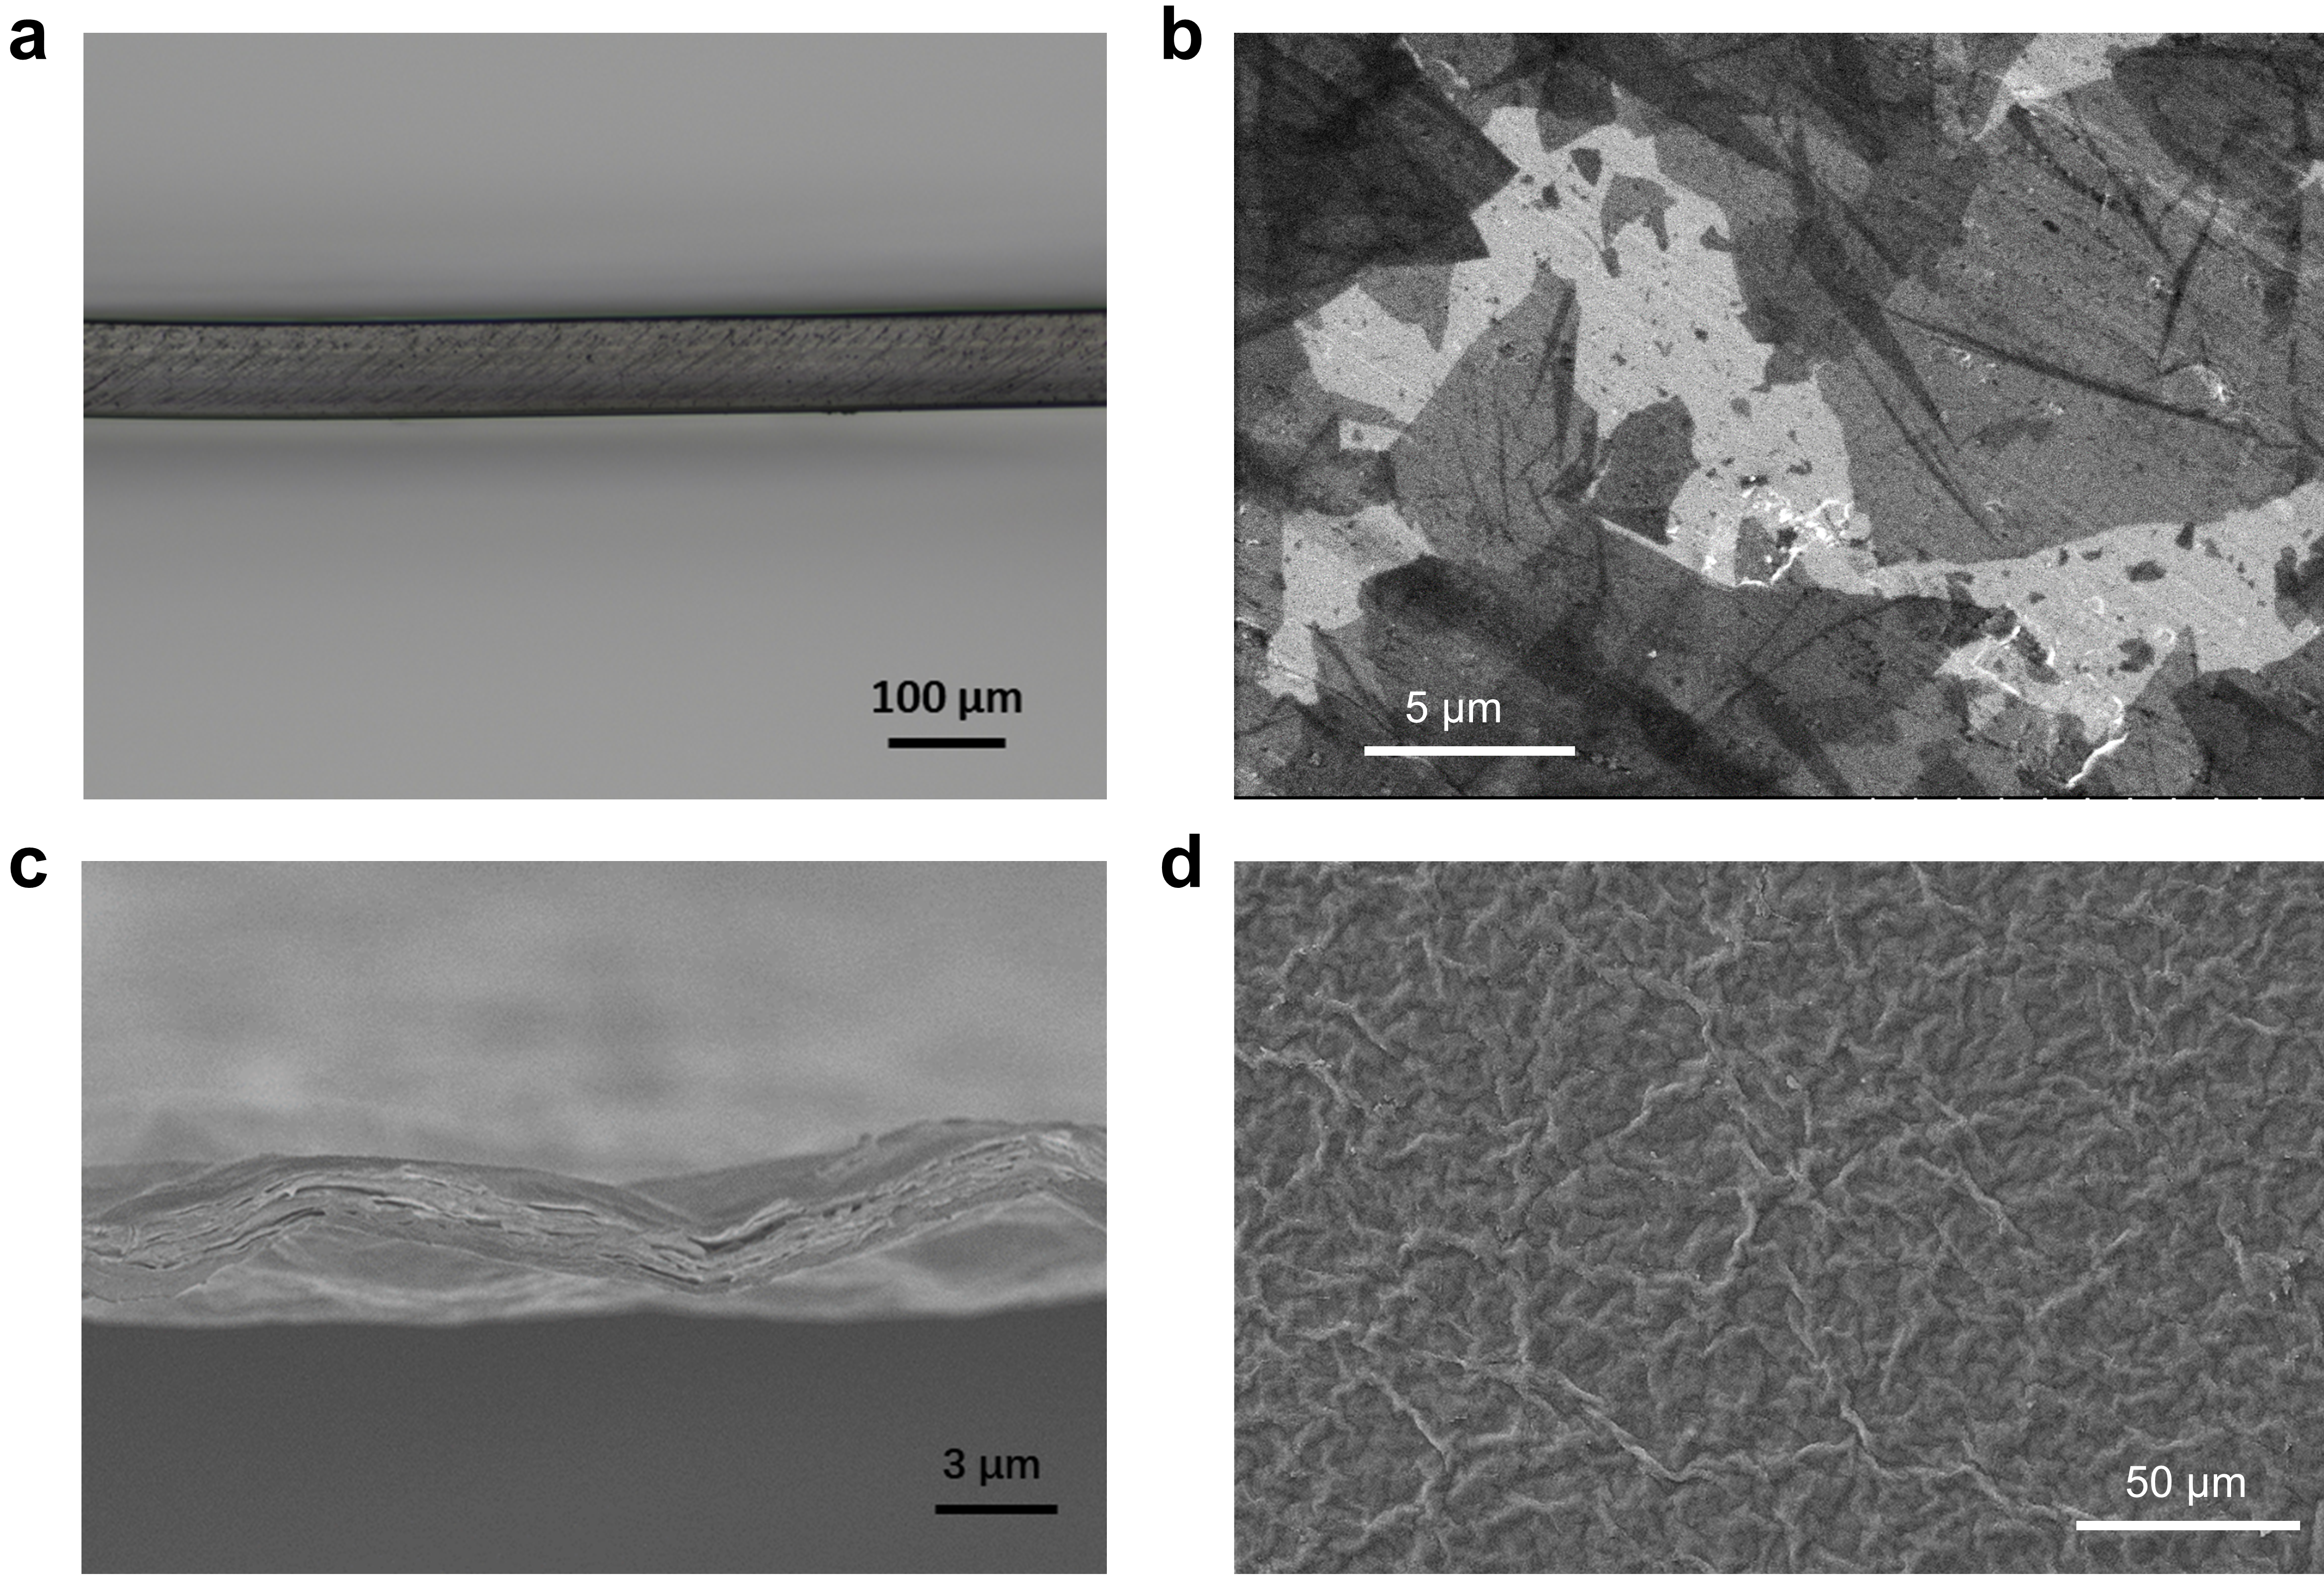


**Supplementary Fig. 2** **Morphology of OPA and GO layer. a** Optical microscope image of the OPA showing a total thickness of ~70 μm. **b** Scanning electron microscopy image of GO sheets with a lateral size of 10-20 μm. **c** Scanning electron microscopy image of the section of GO film with a typical lamellar structure. **d** Scanning electron microscopy image of the surface of GO film.


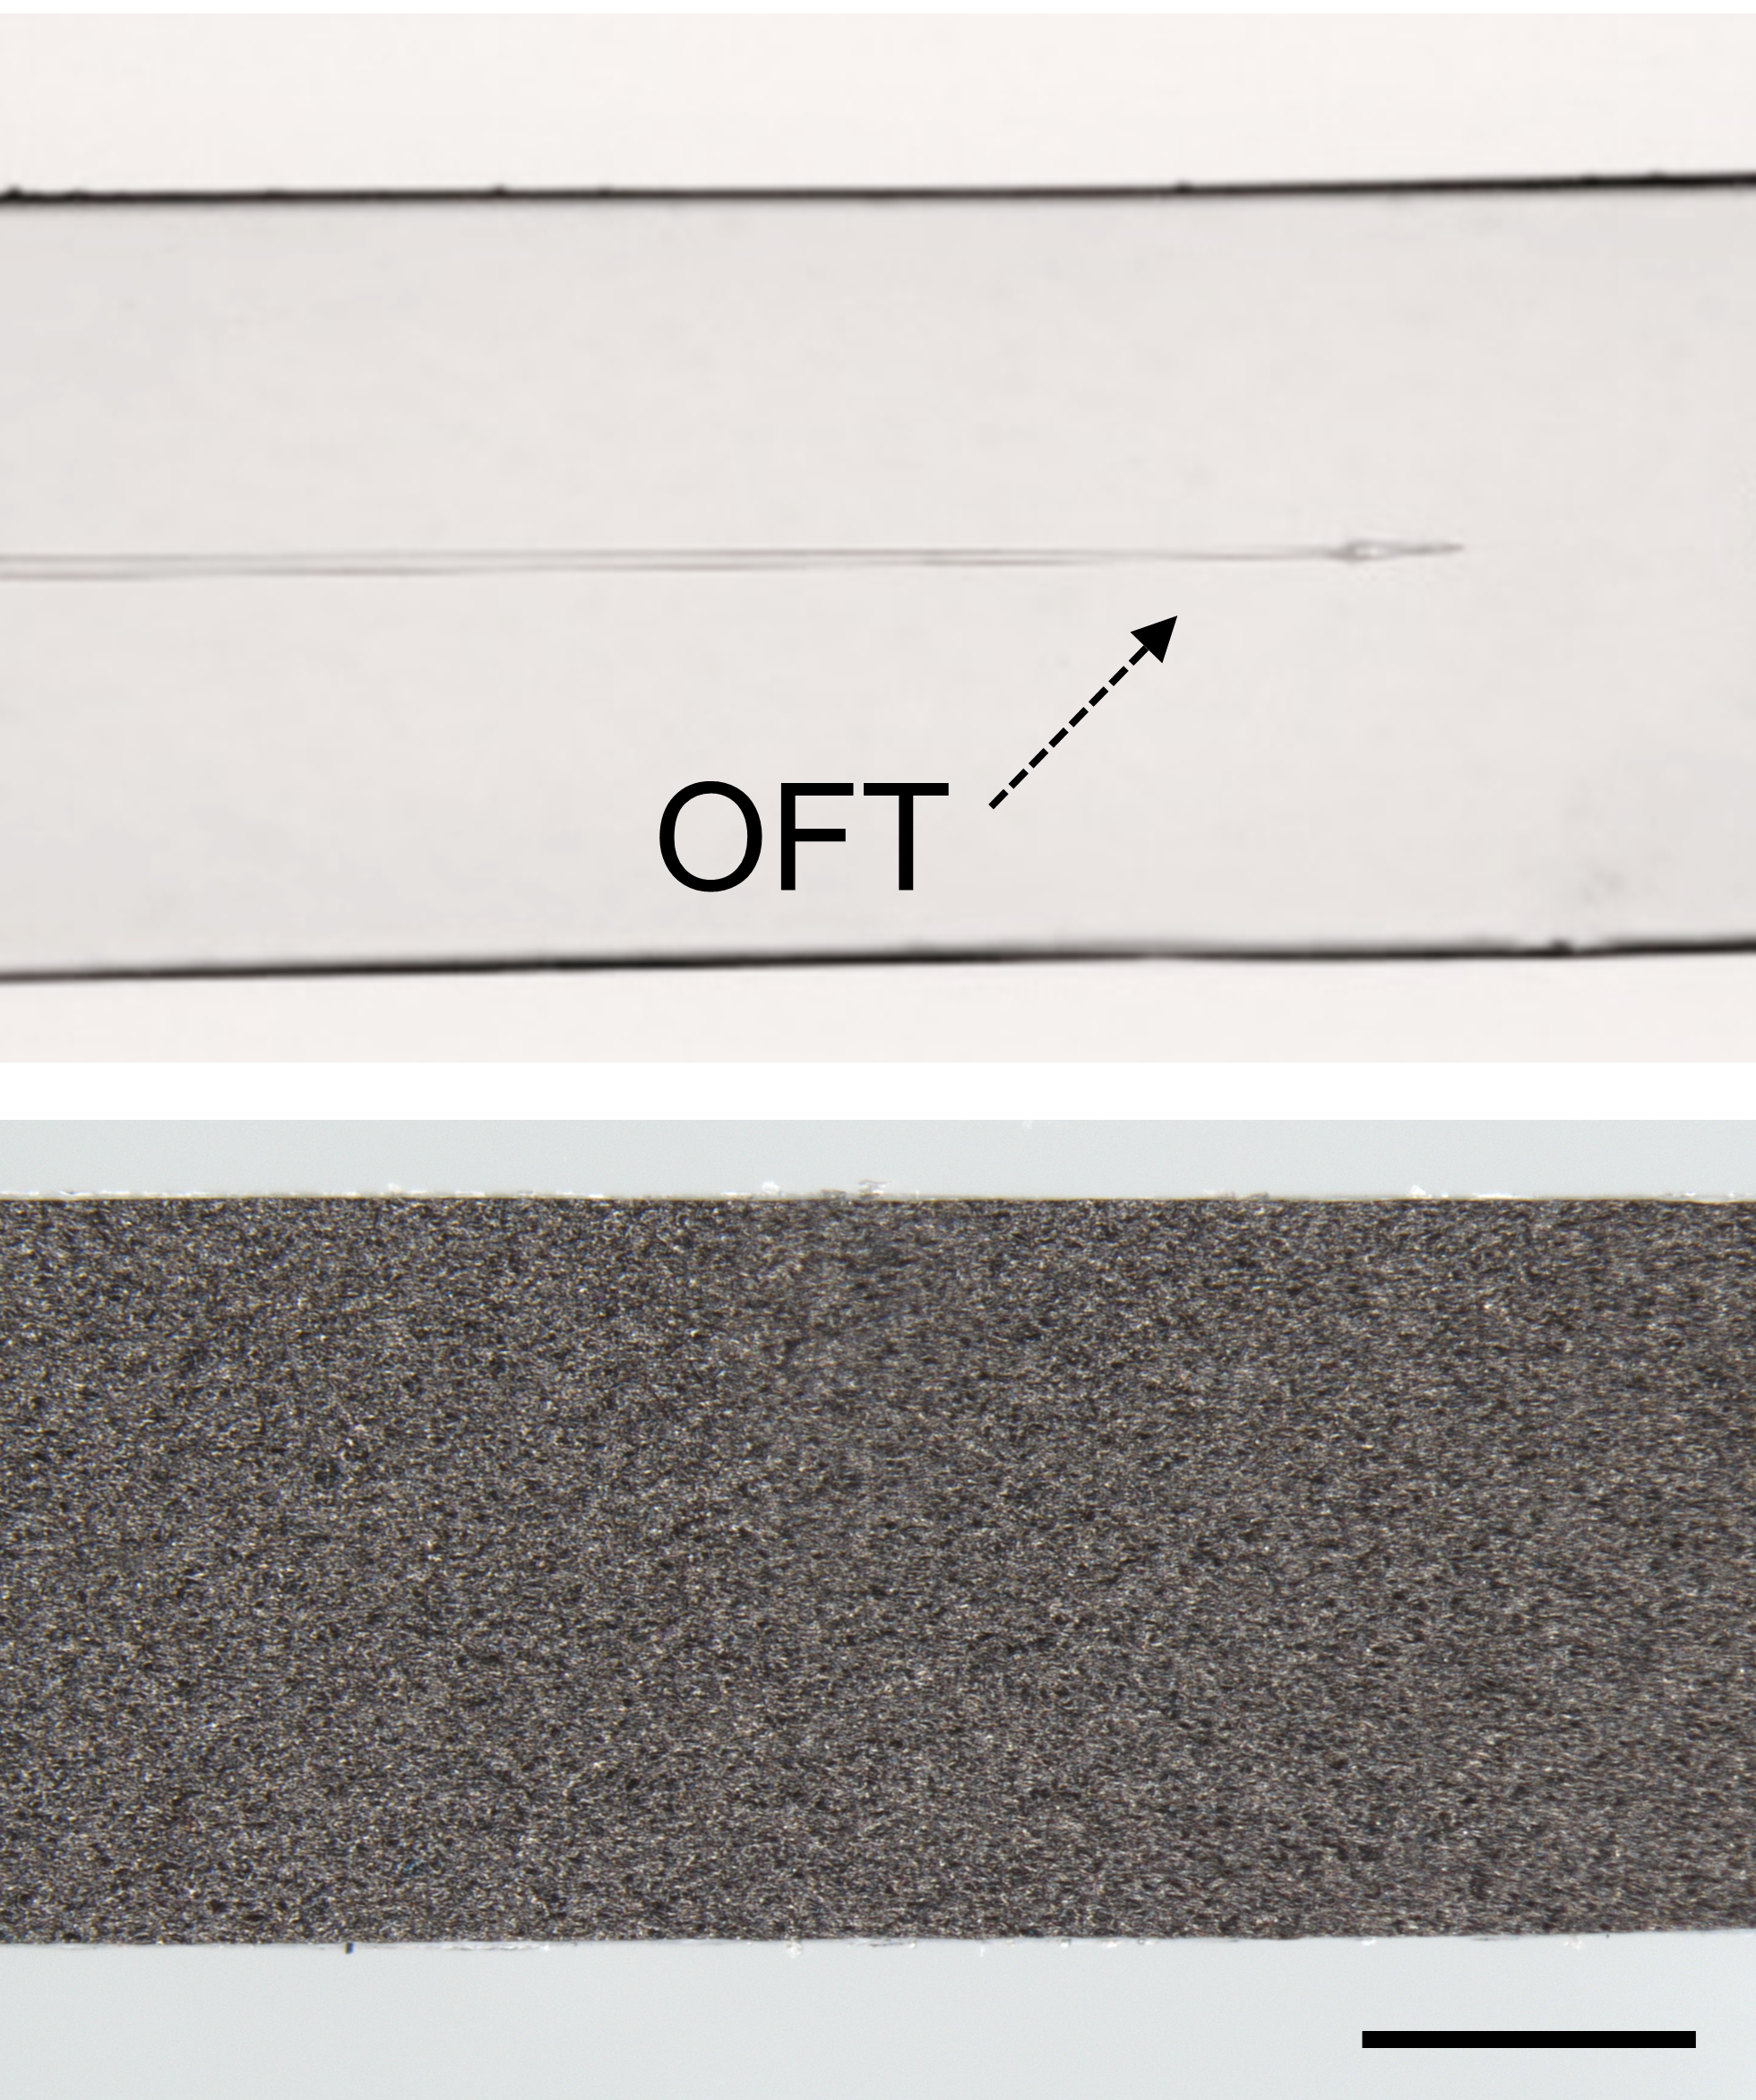


**Supplementary Fig. 3** Optical microscope image of a PDMS-GO film. Scale bar: 100 μm.


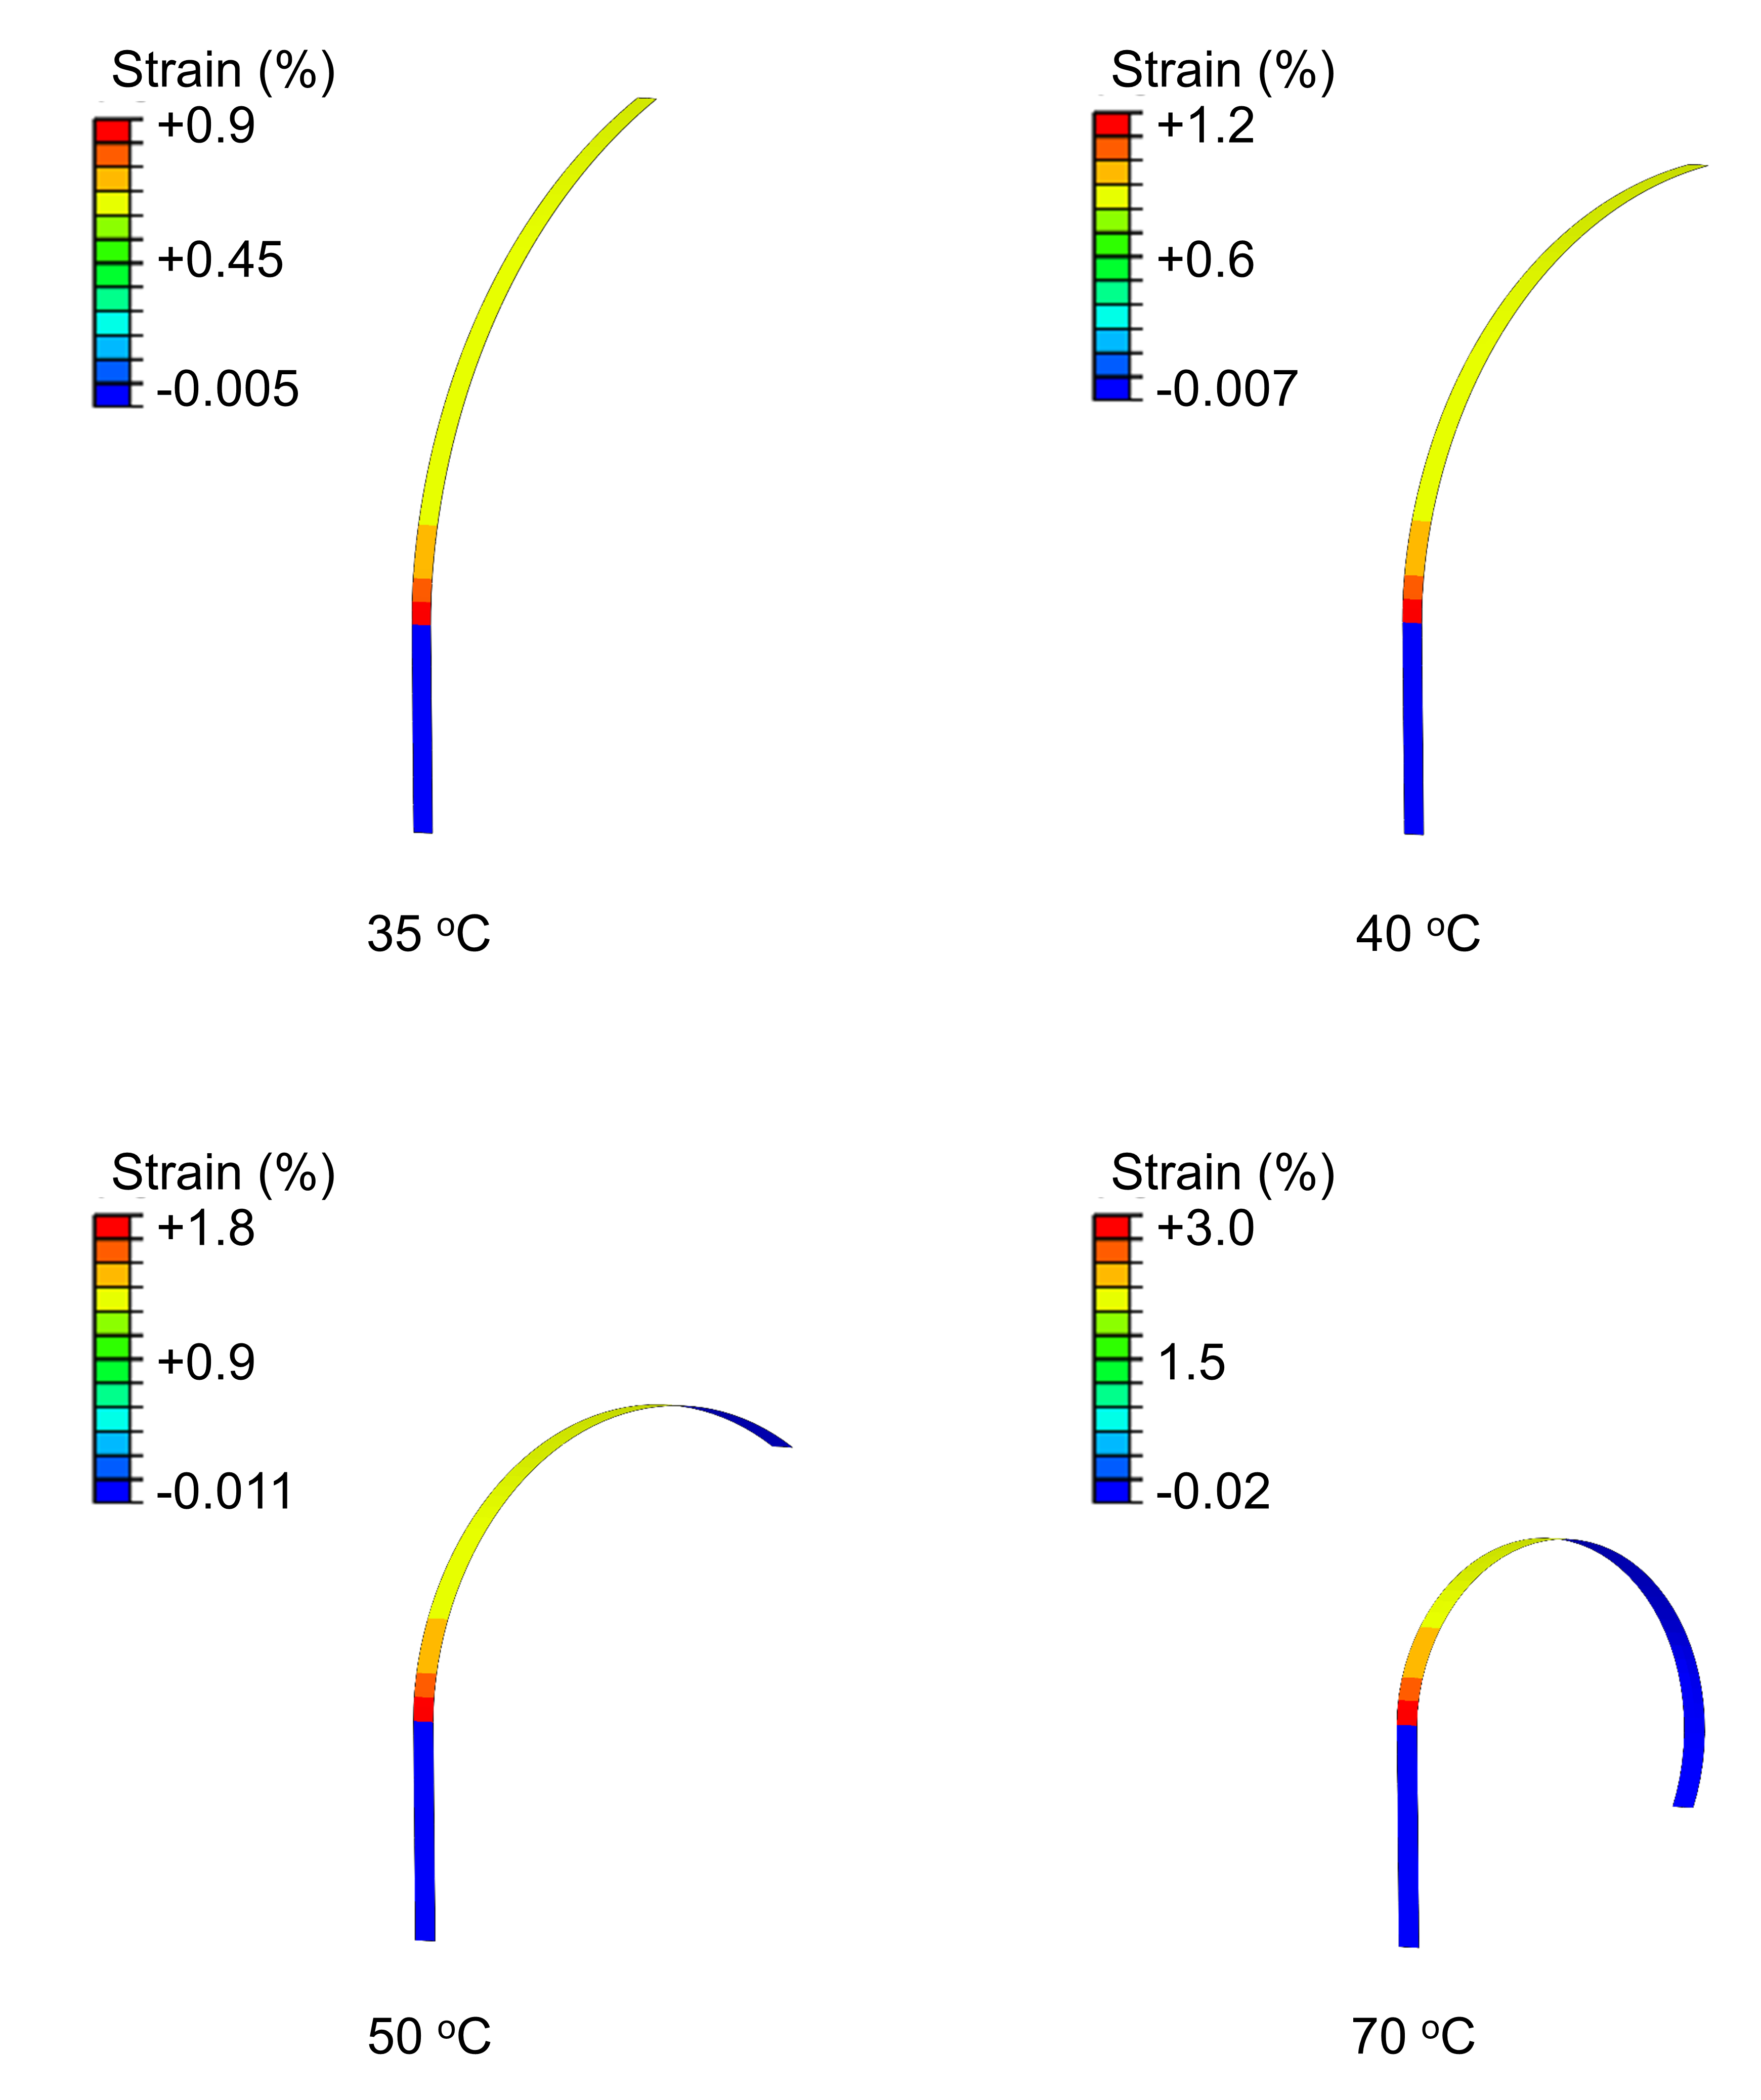


**Supplementary Fig. 4** FEA of the OPA model (10 × 0.5 × 0.07 mm3) by applying various homogeneous temperature on the structure.





**Supplementary Fig. 5** UV-Vis absorbance spectrum of GO.





**Supplementary Fig. 6** Light-driven bending angles of the OPA as a function of the laser power.


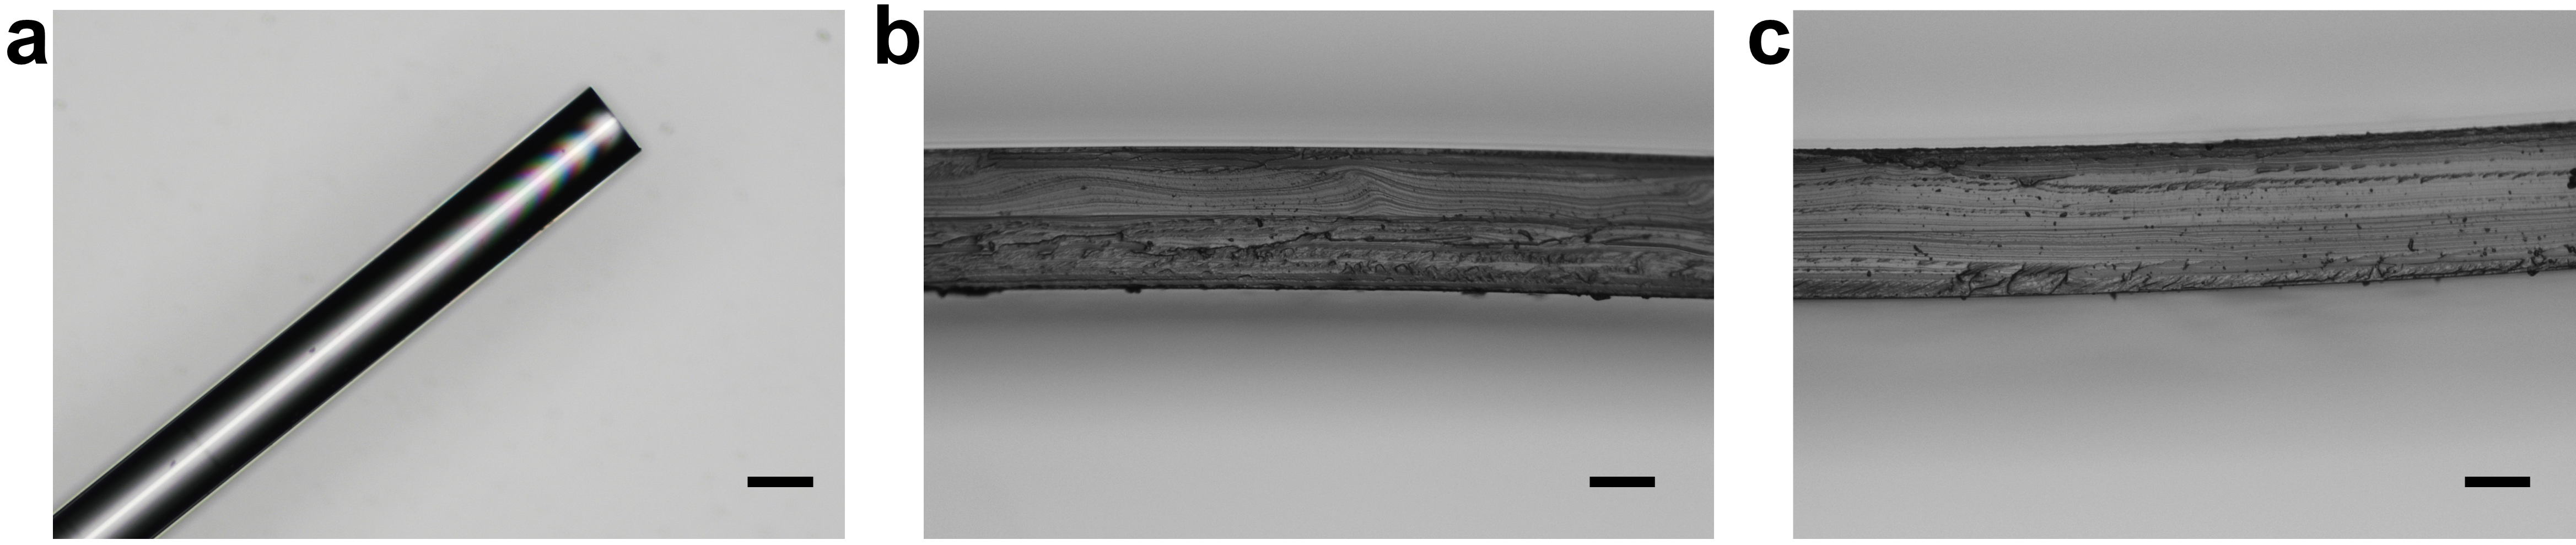


**Supplementary Fig. 7** **Morphology of a standard optical fibre and actuators with large thickness.** **a** Optical microscope image of a standard optical fibre. **b** Optical microscope image of an actuator fabricated with a standard optical fibre showing a total thickness of ~220 μm. **c** Optical microscope image of an OPA with a total thickness of ~225 μm. Scale bar: 100 μm.





**Supplementary Fig. 8** Light-driven bending angles of OPAs (10 × 0.5 mm2) with various thicknesses of PDMS and GO layers under 635-nm laser of 100 mW.


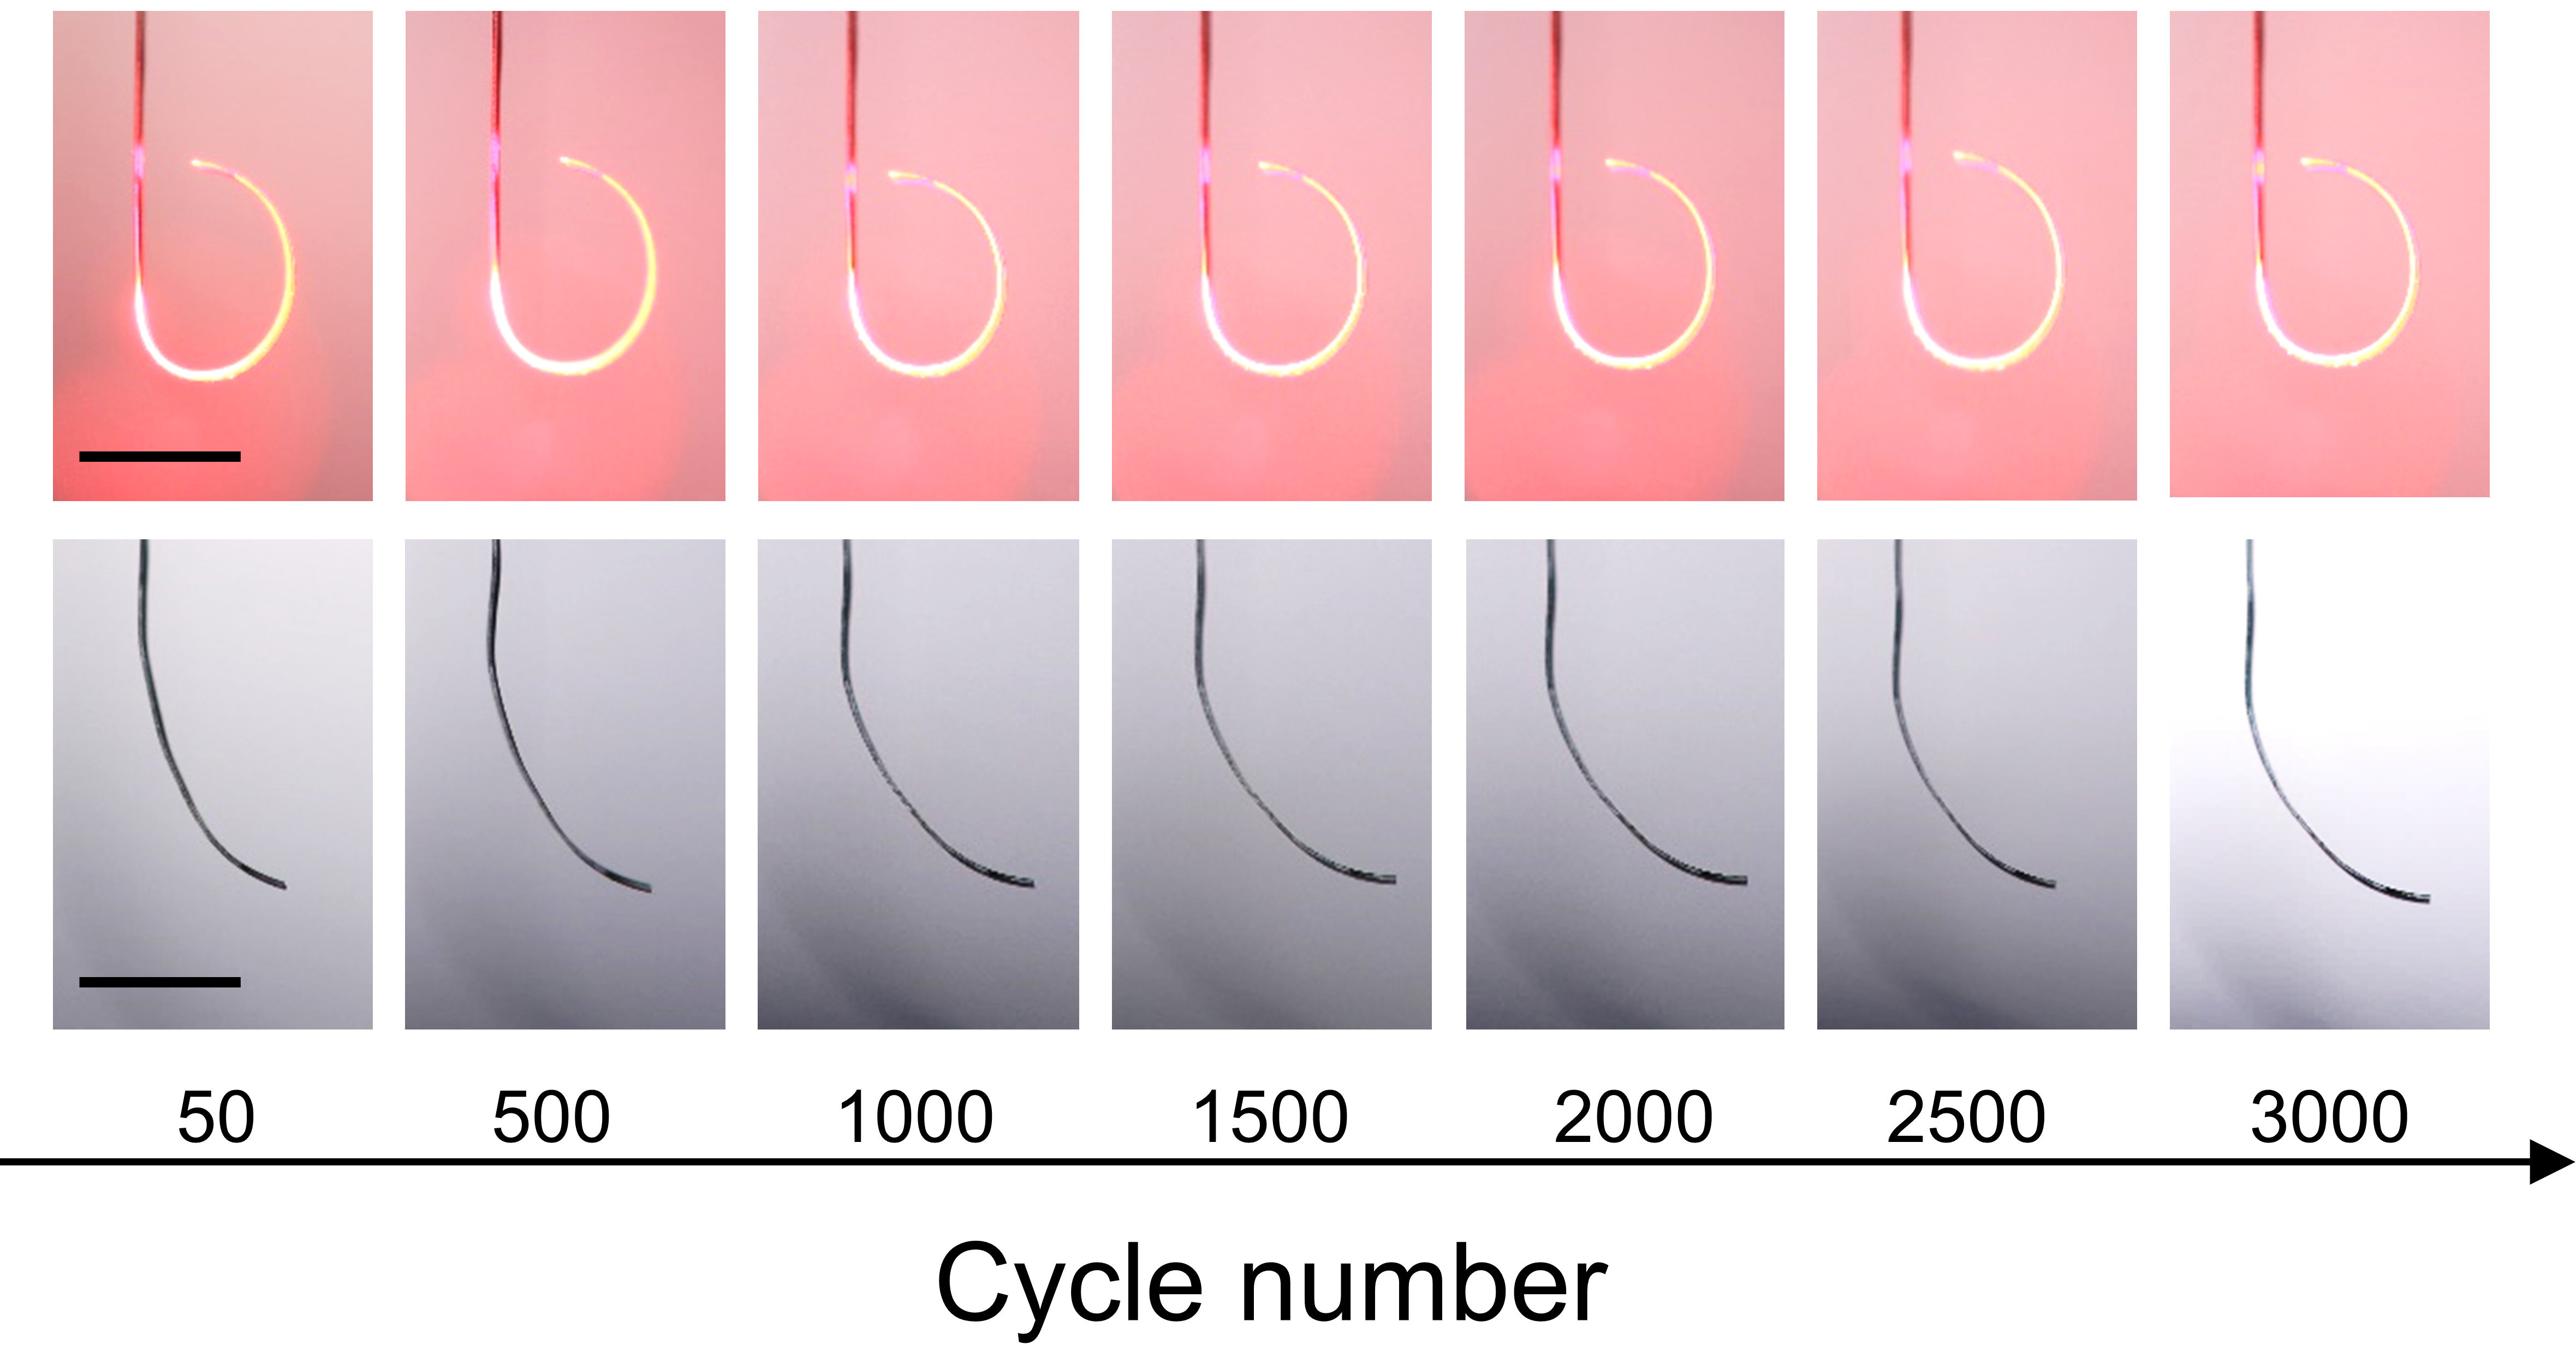


**Supplementary Fig. 9** Photographs showing the bending angles of the OPA (10 × 0.5 × 0.07 mm3) over 3000 cycles of laser-on and laser-off with a power of 100 mW. Scale bar: 5 mm.


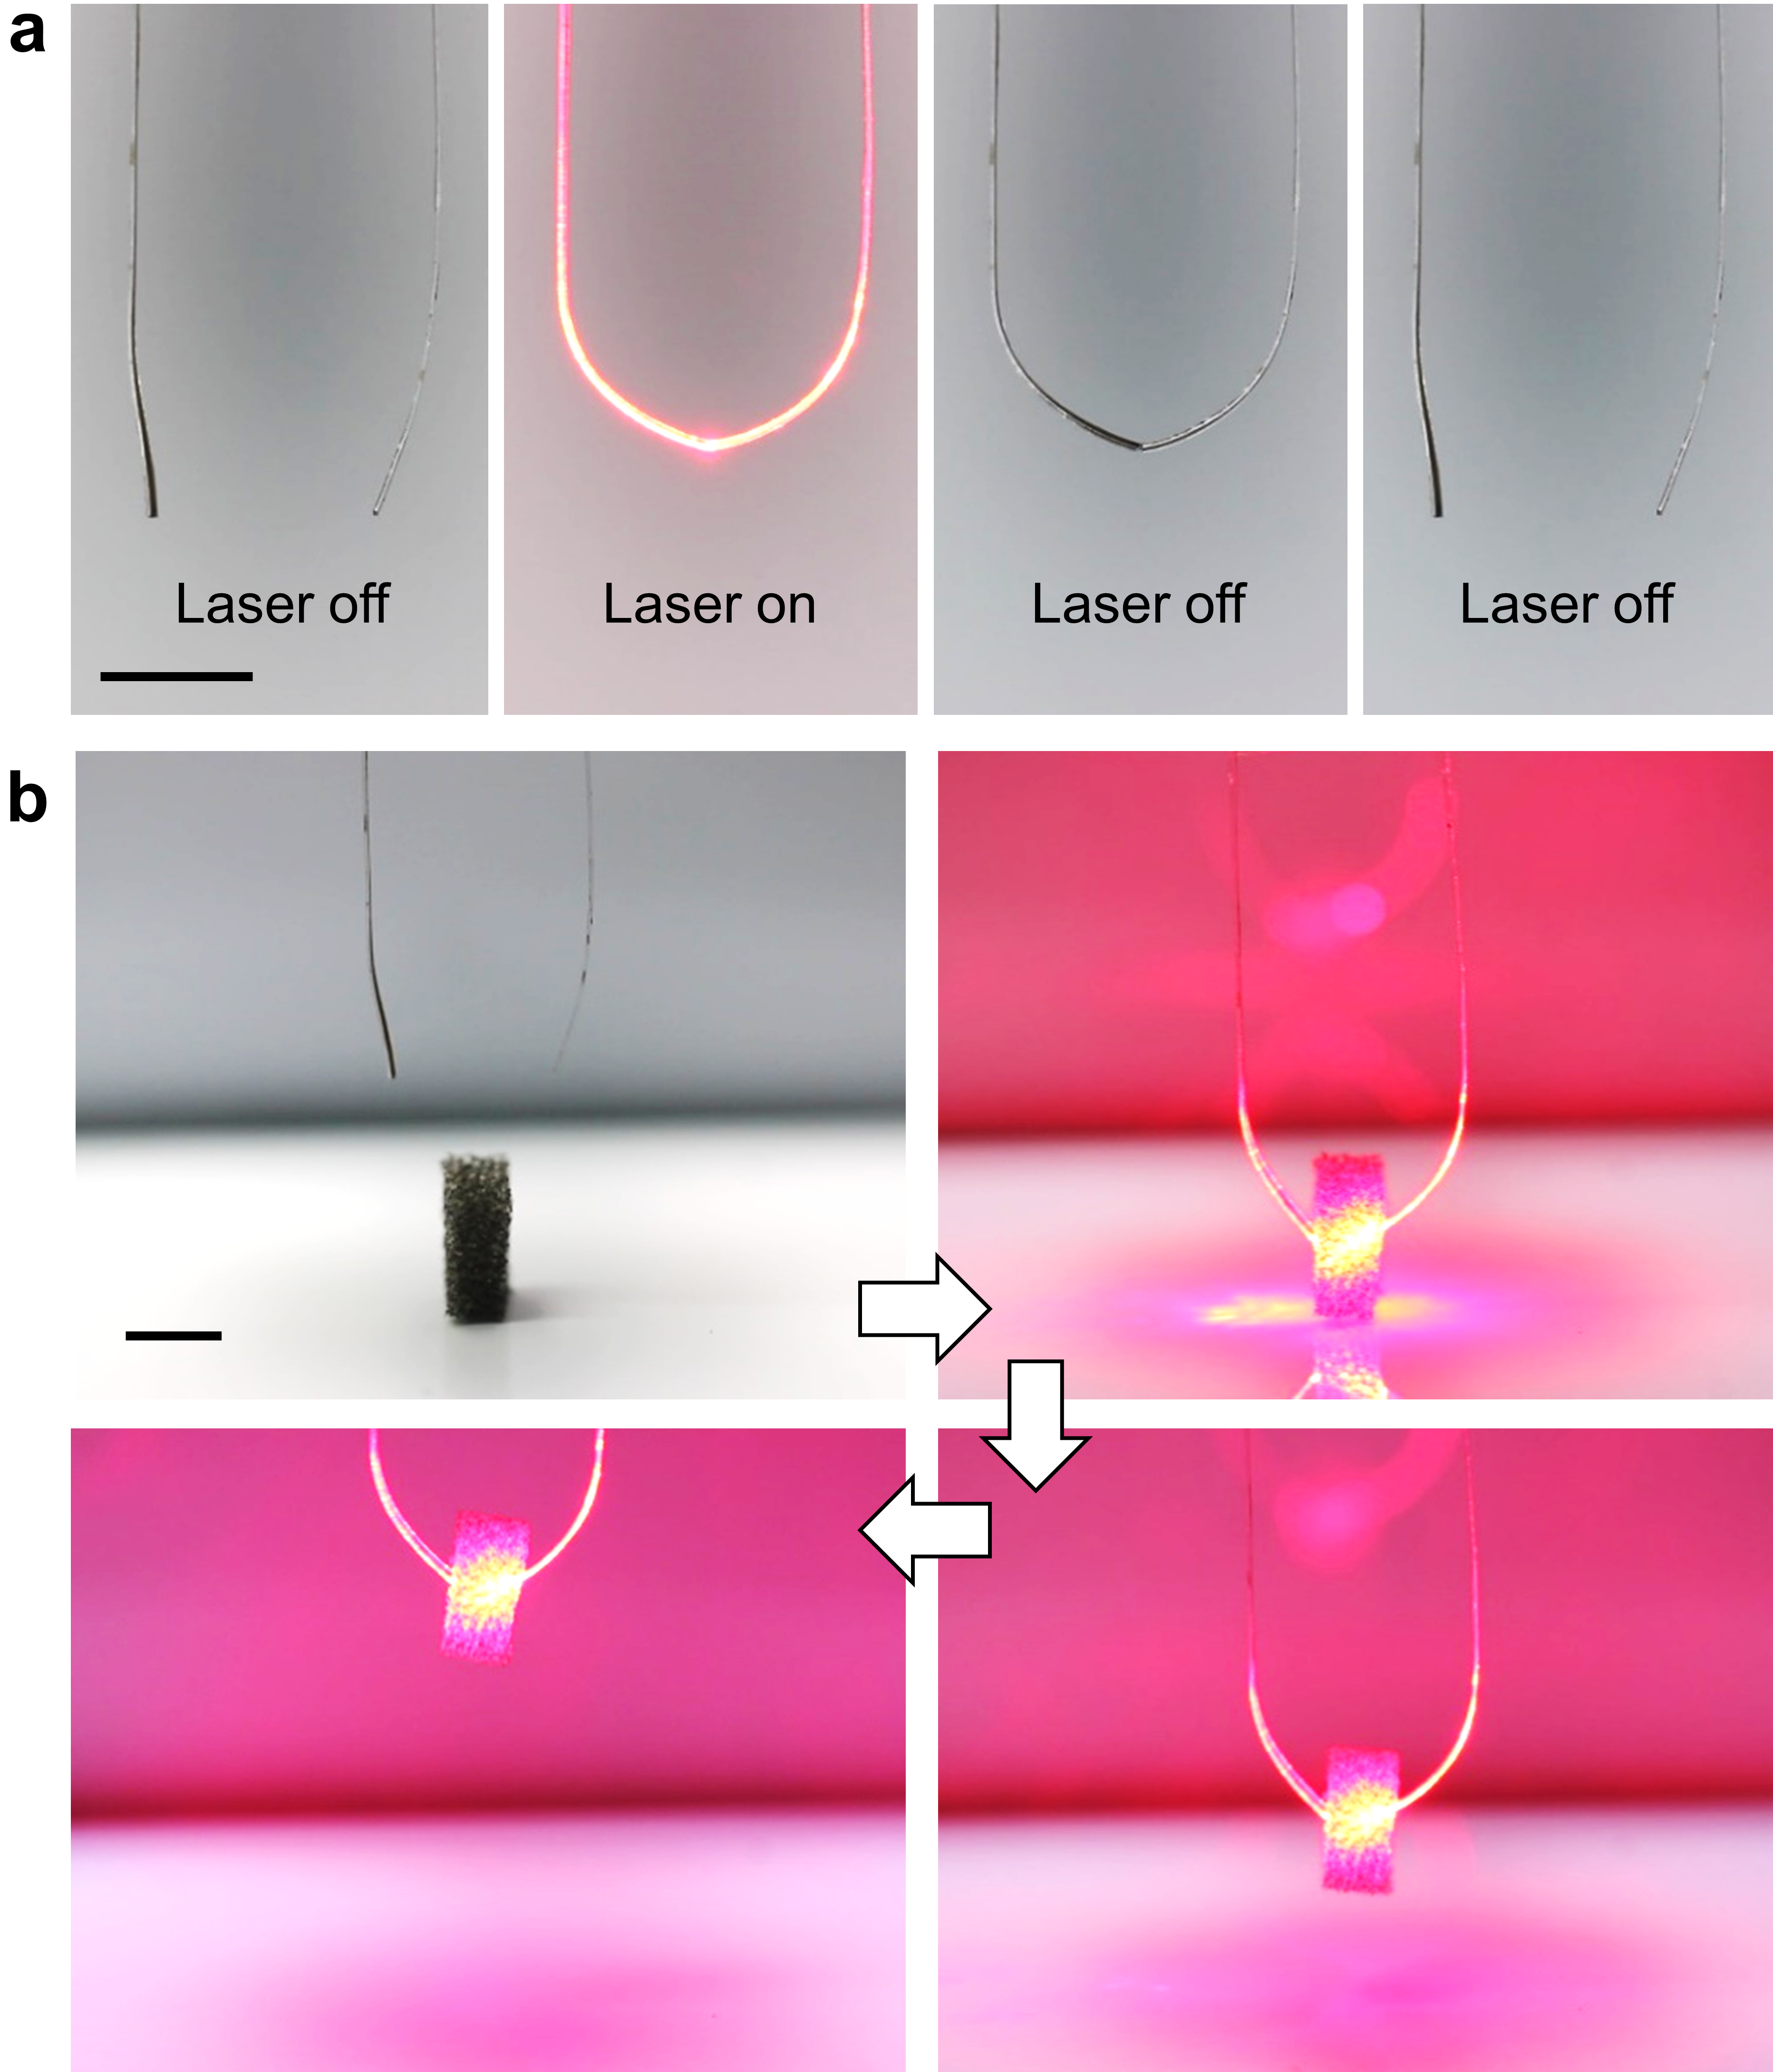


**Supplementary Fig. 10** **OPA soft gripper with inward bending configuration for capturing small objects.** **a** The oppositely bending of the two arms of the OPA gripper. **b** The OPA gripper captures a small cuboid. Scale bar: 5 mm.


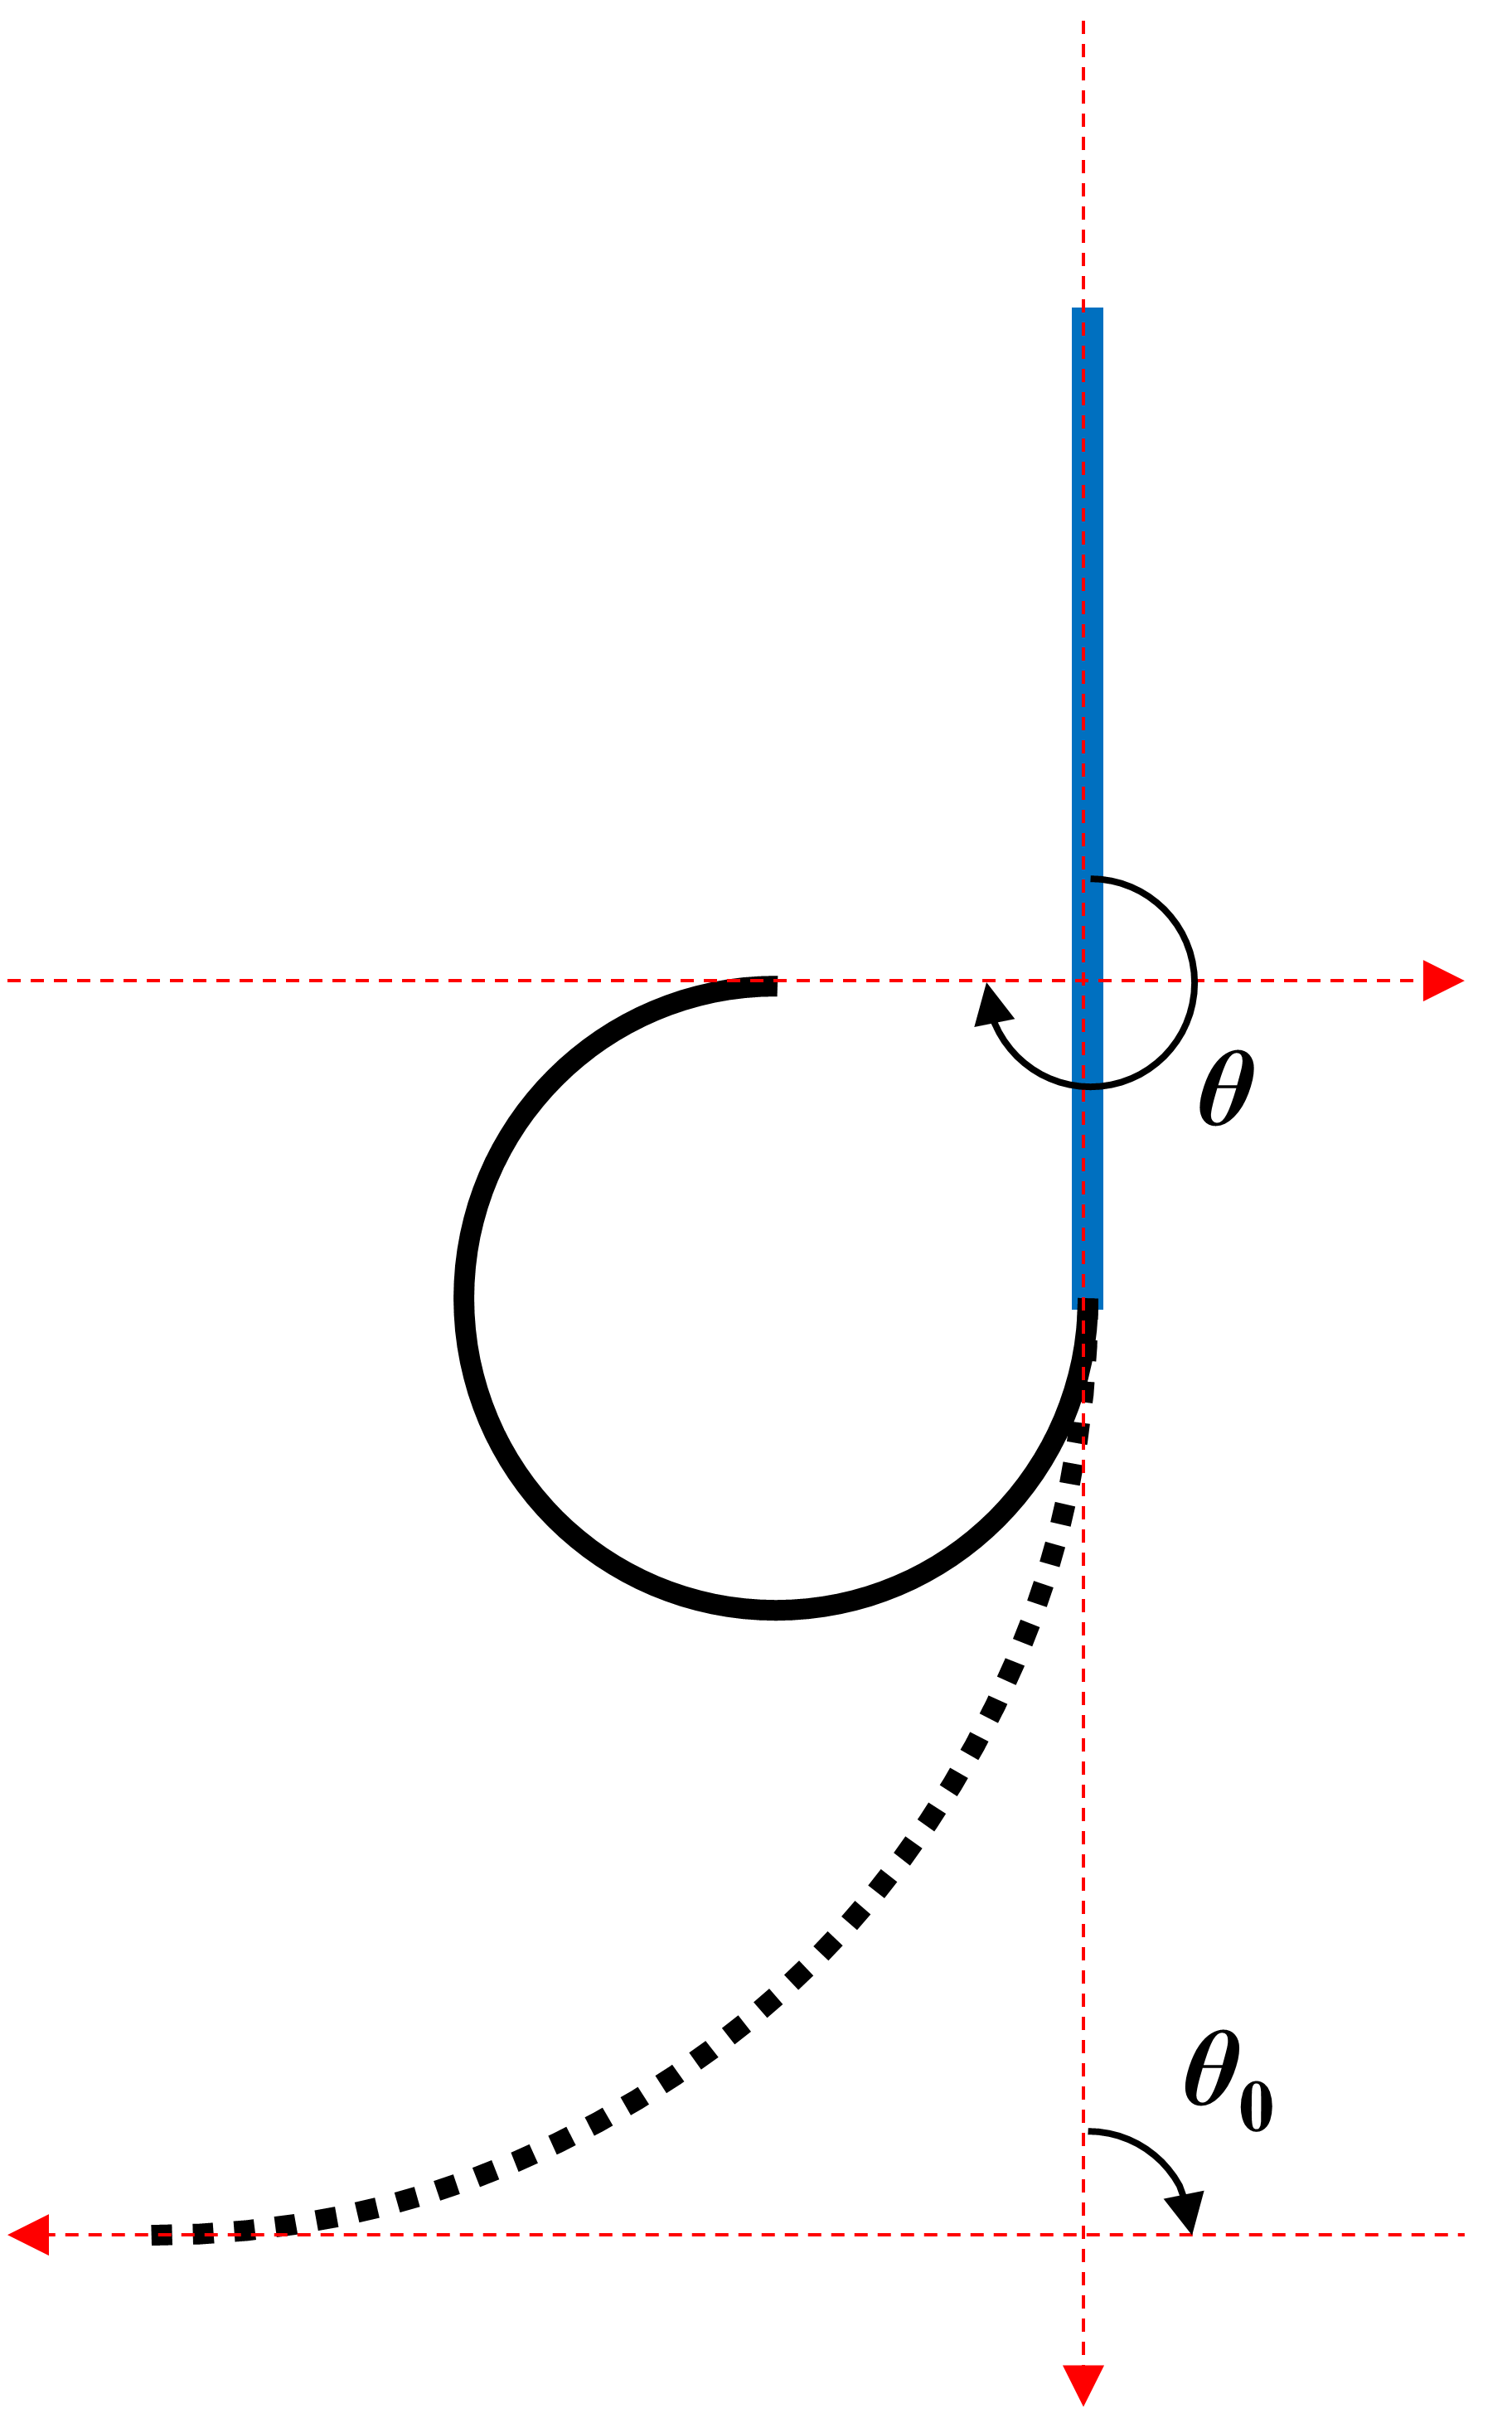


**Supplementary Fig. 11** The schematic for calculating bending angle. The *θ*0 is the original angle and the *θ* is the final angle after deformation. The bending angle after deformation is calculated as ∆*θ=θ-θ*0.
